# Supplementary material
Source: publisher figshare collection journal article supplement (https://frontiersin.figshare.com/ndownloader/files/14523137)

## Supplementary Figure 2

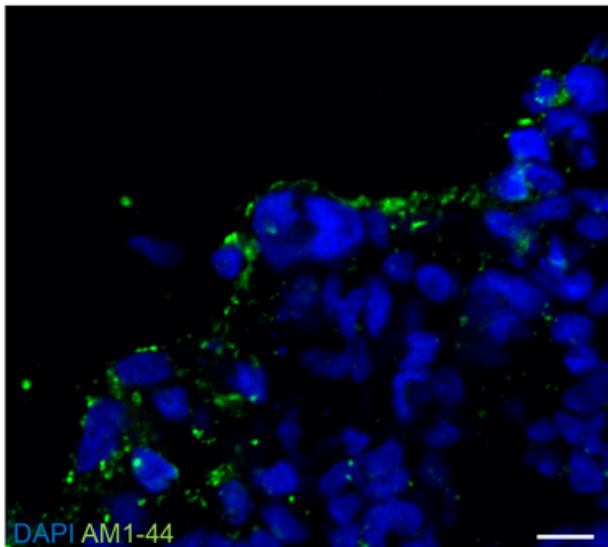

Supplement: Supplementary file [file 14523137]
